# Supplementary material for: Enantioselective interaction of carbamoylated quinine and (S)-3,5-dinitrobenzoyl alanine: theoretical and experimental circular dichroism study
Source: Royal Society of Chemistry journal article supplement (doi:10.1039/c000046a), 2010-01-01
Supplement: c000046a.pdf [file c000046a.pdf]

## Electronic supplementary information for

# Enantioselective interaction of carbamoylated quinine and (S)-3,5-dinitrobenzoyl alanine: theoretical and experimental circular dichroism study

Ondřej Julínek<sup>1</sup>, Martin Krupička<sup>2</sup>, Wolfgang Lindner<sup>3</sup>, Marie Urbanová<sup>4</sup>

<sup>1</sup> *Department of Analytical Chemistry and* <sup>4</sup> *Department of Physics and Measurements, Institute of Chemical Technology, Prague, Technická 5, 166 28 Prague 6, Czech Republic*

<sup>2</sup> *Institute of Chemistry, Slovak Academy of Sciences, Dúbravská cesta 9, 845 38 Bratislava, Slovak Republic*

<sup>3</sup> *Department of Analytical Chemistry and Food Chemistry, University of Vienna, Währinger Strasse 38, 1090 Vienna, Austria*

|                                                                     |             |
|---------------------------------------------------------------------|-------------|
| 1. BHandH/6-31+G** structures (S1-S5)                               | pages 2-10  |
| 2. BHandH spectra using various basis sets (S6-S9)                  | pages 11-12 |
| 3. Assignment of important vibration modes of tBuCQN (S10)          | page 13     |
| 4. Experimental spectra of complexes with DNB-Ala and DNB-Leu (S11) | page 14     |
| 5. Details about the conformational analysis (S12)                  | page 15     |

**S1:** BHandH/6-31+G\*\* structure of (S)-DNB-Ala.

|   |          |          |          |
|---|----------|----------|----------|
| N | -2.13736 | -0.17421 | 0.02540  |
| H | -2.02803 | 0.77608  | -0.29742 |
| C | -3.47612 | -0.67293 | 0.03884  |
| C | -3.94056 | -1.06533 | 1.42328  |
| C | -4.33644 | 0.39944  | -0.54369 |
| O | -5.60146 | 0.05236  | -0.61342 |
| O | -3.92289 | 1.46653  | -0.89949 |
| C | -1.11207 | -1.01998 | 0.15308  |
| O | -1.26736 | -2.21008 | 0.32017  |
| C | 0.25697  | -0.44488 | 0.08525  |
| C | 0.52602  | 0.90666  | 0.16954  |
| C | 1.29604  | -1.34789 | -0.04573 |
| C | 1.83543  | 1.32834  | 0.10495  |
| H | -0.24280 | 1.65641  | 0.30450  |
| C | 2.58418  | -0.87501 | -0.11030 |
| H | 1.08282  | -2.40829 | -0.08996 |
| C | 2.89137  | 0.46302  | -0.03730 |
| H | 3.91227  | 0.81532  | -0.08521 |
| N | 3.67025  | -1.82090 | -0.25585 |
| O | 4.78329  | -1.37300 | -0.30562 |
| O | 3.38089  | -2.98348 | -0.31720 |
| N | 2.11104  | 2.74489  | 0.20057  |
| O | 3.25888  | 3.08766  | 0.13591  |
| O | 1.16943  | 3.47853  | 0.33770  |
| H | -6.09925 | 0.78671  | -0.99024 |
| H | -3.28167 | -1.84433 | 1.80325  |
| H | -3.90512 | -0.20764 | 2.09656  |
| H | -3.54112 | -1.55227 | -0.61207 |
| H | -4.95982 | -1.44719 | 1.38783  |

**S2:** BHandH/6-31+G\*\* structure of *anti*-closed conformer of *t*BuCQN.

|   |          |          |          |
|---|----------|----------|----------|
| C | -0.25283 | -0.23924 | 0.25572  |
| C | 0.78330  | -0.87102 | 1.12847  |
| C | 2.08998  | -1.15583 | 0.66633  |
| C | 0.48153  | -1.17741 | 2.42011  |
| C | 2.52665  | -0.90784 | -0.63979 |
| C | 2.98801  | -1.73994 | 1.58902  |
| C | 1.45477  | -1.74982 | 3.25181  |
| C | 3.79781  | -1.22194 | -1.02331 |
| C | 4.28880  | -2.04733 | 1.16559  |
| N | 2.66021  | -2.02327 | 2.86345  |
| C | 4.69470  | -1.79899 | -0.10929 |
| O | 4.13065  | -0.94522 | -2.29300 |
| C | 5.41236  | -1.25765 | -2.72595 |
| O | -1.52109 | -0.68584 | 0.68837  |
| C | -2.35495 | -1.14560 | -0.24739 |
| O | -2.09813 | -1.15606 | -1.42670 |
| N | -3.49249 | -1.57040 | 0.30524  |
| C | -4.60416 | -2.12442 | -0.44682 |
| C | -5.13354 | -1.09359 | -1.41901 |
| C | -4.16280 | -3.36925 | -1.18436 |
| C | -5.66613 | -2.47237 | 0.56686  |
| H | -0.13524 | -0.54840 | -0.78334 |
| H | -0.51311 | -0.99294 | 2.80347  |
| H | 1.88103  | -0.44425 | -1.37002 |
| H | 1.20658  | -1.98861 | 4.28110  |
| H | 4.95462  | -2.49194 | 1.89349  |
| H | 5.70277  | -2.04733 | -0.40933 |
| H | 5.46506  | -0.96147 | -3.77039 |
| H | 6.17311  | -0.70966 | -2.16193 |
| H | 5.61294  | -2.33054 | -2.65025 |
| H | -3.55151 | -1.52260 | 1.30733  |
| H | -5.46852 | -0.20228 | -0.88479 |
| H | -4.35680 | -0.80906 | -2.12827 |
| H | -5.98042 | -1.50265 | -1.97282 |
| H | -3.79829 | -4.12056 | -0.48120 |
| H | -5.00258 | -3.79341 | -1.73778 |
| H | -3.36531 | -3.12940 | -1.88700 |
| H | -6.53603 | -2.89469 | 0.06382  |
| H | -5.29852 | -3.21338 | 1.28105  |
| H | -5.99205 | -1.58459 | 1.11445  |
| C | -0.24612 | 1.27561  | 0.36040  |
| C | -1.50271 | 1.93563  | -0.21255 |
| H | -0.17493 | 1.50484  | 1.42969  |
| C | 0.78146  | 1.90496  | -1.69344 |
| C | 1.12374  | 3.16888  | 0.26337  |
| C | -1.07833 | 3.25482  | -0.83891 |
| H | -1.95251 | 1.30511  | -0.98621 |
| H | -2.25584 | 2.07698  | 0.56469  |

|   |          |         |          |
|---|----------|---------|----------|
| H | 1.75492  | 2.13539 | -2.13151 |
| H | 0.49956  | 0.91781 | -2.06515 |
| C | -0.28268 | 2.93383 | -2.08811 |
| C | -0.15327 | 4.02698 | 0.10123  |
| H | 1.96287  | 3.62395 | -0.26745 |
| H | 1.41075  | 3.10152 | 1.31575  |
| H | -1.95167 | 3.86520 | -1.07582 |
| H | 0.17344  | 3.84609 | -2.48308 |
| H | -0.93557 | 2.53500 | -2.86761 |
| H | 0.10244  | 4.97410 | -0.38529 |
| N | 0.93654  | 1.83500 | -0.25423 |
| C | -0.79062 | 4.34925 | 1.40149  |
| C | -1.04461 | 5.57334 | 1.83087  |
| H | -1.05393 | 3.50703 | 2.03907  |
| H | -1.50896 | 5.75582 | 2.79132  |
| H | -0.79171 | 6.44008 | 1.22945  |

**S3:** BHandH/6-31+G\*\* structure of *anti*-open conformer of *t*BuCQN.

|   |          |          |          |
|---|----------|----------|----------|
| N | -0.00928 | 1.91936  | -1.06873 |
| C | 0.27826  | 1.21463  | 0.16442  |
| C | -0.36690 | 1.92046  | 1.36765  |
| C | -1.22399 | 3.05864  | 0.84131  |
| C | -2.21929 | 2.49085  | -0.15344 |
| C | -1.42935 | 1.94512  | -1.35100 |
| C | 0.46417  | 3.27486  | -0.93627 |
| C | -0.35397 | 4.07223  | 0.10005  |
| C | -0.09000 | -0.25757 | 0.04728  |
| O | -1.42691 | -0.45101 | 0.44807  |
| C | -2.21741 | -1.16193 | -0.36227 |
| N | -3.43525 | -1.28557 | 0.17135  |
| C | -4.53908 | -1.97070 | -0.47689 |
| C | -5.71173 | -1.86716 | 0.46671  |
| C | 0.51800  | 4.86806  | 0.99413  |
| C | 0.47680  | 6.18386  | 1.11562  |
| C | 0.80508  | -1.11078 | 0.88078  |
| C | 2.14804  | -1.31918 | 0.48196  |
| C | 2.95416  | -2.11685 | 1.32097  |
| N | 2.50469  | -2.67571 | 2.46218  |
| C | 1.26939  | -2.46960 | 2.79078  |
| C | 0.37696  | -1.69445 | 2.03013  |
| C | 4.28611  | -2.34708 | 0.95272  |
| C | 4.80423  | -1.81926 | -0.19072 |
| C | 3.99545  | -1.02935 | -1.02421 |
| C | 2.69218  | -0.78311 | -0.69195 |
| O | 4.44095  | -0.48512 | -2.16282 |
| C | 5.75431  | -0.72421 | -2.54715 |
| O | -1.86645 | -1.59946 | -1.42821 |
| C | -4.86774 | -1.29212 | -1.78855 |
| C | -4.18417 | -3.42303 | -0.70632 |
| H | -0.00856 | -0.55391 | -1.00117 |
| H | -0.64660 | -1.56677 | 2.35517  |
| H | 2.10311  | -0.16930 | -1.36366 |
| H | 0.92549  | -2.93074 | 3.71112  |
| H | 4.88515  | -2.96225 | 1.61131  |
| H | 5.83462  | -2.01435 | -0.45147 |
| H | 5.89707  | -0.20412 | -3.49059 |
| H | 6.46581  | -0.33328 | -1.81380 |
| H | 5.94138  | -1.79152 | -2.69695 |
| H | -3.58031 | -0.86029 | 1.07041  |
| H | -5.13887 | -0.24784 | -1.61986 |
| H | -4.01037 | -1.32946 | -2.46017 |
| H | -5.70986 | -1.79349 | -2.26893 |
| H | -3.96580 | -3.91701 | 0.24243  |
| H | -5.01976 | -3.94101 | -1.18041 |
| H | -3.31054 | -3.50290 | -1.35254 |
| H | -6.58022 | -2.36578 | 0.03635  |

|   |          |          |          |
|---|----------|----------|----------|
| H | -5.48882 | -2.34646 | 1.42313  |
| H | -5.97902 | -0.82305 | 0.64781  |
| H | 1.36484  | 1.24328  | 0.27062  |
| H | -0.98899 | 1.22861  | 1.93817  |
| H | 0.39715  | 2.29618  | 2.05096  |
| H | -1.56439 | 2.57745  | -2.23136 |
| H | -1.75967 | 0.94741  | -1.64333 |
| H | 0.42714  | 3.76116  | -1.91337 |
| H | 1.51712  | 3.23822  | -0.64089 |
| H | -1.74147 | 3.55456  | 1.66534  |
| H | -2.92292 | 3.26583  | -0.46796 |
| H | -2.79920 | 1.69614  | 0.32244  |
| H | -1.02513 | 4.76739  | -0.41683 |
| H | 1.25028  | 4.31010  | 1.57583  |
| H | 1.14457  | 6.71547  | 1.78106  |
| H | -0.23193 | 6.77606  | 0.54666  |

**S4:** BHandH/6-31+G\*\* structure of *syn*-closed conformer of *t*BuCQN.

|   |          |          |          |
|---|----------|----------|----------|
| C | -0.27748 | 0.23185  | -0.98271 |
| C | 0.85780  | -0.53526 | -1.57106 |
| C | 1.76317  | -1.28969 | -0.78335 |
| C | 1.07869  | -0.46984 | -2.90998 |
| C | 1.65122  | -1.44652 | 0.60489  |
| C | 2.84159  | -1.90664 | -1.45599 |
| C | 2.18189  | -1.12807 | -3.47621 |
| C | 2.57331  | -2.17408 | 1.30180  |
| C | 3.76835  | -2.64968 | -0.71182 |
| N | 3.03347  | -1.81770 | -2.78641 |
| C | 3.64879  | -2.78496 | 0.63745  |
| O | 2.38711  | -2.27083 | 2.62676  |
| C | 3.30748  | -2.99316 | 3.37555  |
| O | -1.01751 | -0.59932 | -0.11159 |
| C | -2.32712 | -0.71764 | -0.34601 |
| O | -2.91165 | -0.10772 | -1.20811 |
| N | -2.87705 | -1.58219 | 0.50772  |
| C | -4.28417 | -1.93880 | 0.50970  |
| C | -5.12720 | -0.71029 | 0.77079  |
| C | -4.66288 | -2.56888 | -0.81260 |
| C | -4.46458 | -2.93505 | 1.62834  |
| H | -0.95117 | 0.54136  | -1.78252 |
| H | 0.41183  | 0.09970  | -3.54545 |
| H | 0.82174  | -1.01659 | 1.14729  |
| H | 2.35133  | -1.06864 | -4.54639 |
| H | 4.58340  | -3.11024 | -1.25456 |
| H | 4.37901  | -3.36286 | 1.18570  |
| H | 2.97588  | -2.93588 | 4.40901  |
| H | 3.34015  | -4.04319 | 3.07012  |
| H | 4.31168  | -2.56587 | 3.29992  |
| H | -2.24957 | -2.04835 | 1.14006  |
| H | -4.86446 | -0.26573 | 1.73268  |
| H | -4.97261 | 0.03007  | -0.01358 |
| H | -6.18426 | -0.98128 | 0.79313  |
| H | -4.06973 | -3.46795 | -0.99091 |
| H | -5.71812 | -2.84794 | -0.80594 |
| H | -4.49178 | -1.86758 | -1.62895 |
| H | -5.50796 | -3.24542 | 1.68495  |
| H | -3.85715 | -3.82782 | 1.46005  |
| H | -4.18963 | -2.49703 | 2.59083  |
| C | 0.17412  | 1.45396  | -0.20821 |
| C | -0.95926 | 2.09647  | 0.59480  |
| H | 0.96785  | 1.13329  | 0.47407  |
| C | -0.22541 | 3.16472  | -1.82644 |
| C | 1.54586  | 3.34499  | -0.28953 |
| C | -0.76555 | 3.60234  | 0.53095  |
| H | -1.93169 | 1.84479  | 0.15863  |
| H | -0.96494 | 1.73070  | 1.62326  |

|   |          |         |          |
|---|----------|---------|----------|
| H | 0.28284  | 3.76038 | -2.58733 |
| H | -0.86215 | 2.45834 | -2.36147 |
| C | -1.06135 | 4.04418 | -0.88869 |
| C | 0.68677  | 3.96980 | 0.83518  |
| H | 1.94214  | 4.12197 | -0.94702 |
| H | 2.40374  | 2.81494 | 0.13209  |
| H | -1.42535 | 4.10413 | 1.24114  |
| H | -0.81013 | 5.10194 | -1.00849 |
| H | -2.12690 | 3.93887 | -1.10480 |
| H | 0.77040  | 5.06100 | 0.79782  |
| N | 0.78054  | 2.42387 | -1.09429 |
| C | 1.11900  | 3.53047 | 2.18451  |
| C | 1.46283  | 4.34558 | 3.16659  |
| H | 1.15912  | 2.45624 | 2.35786  |
| H | 1.77482  | 3.97295 | 4.13365  |
| H | 1.44409  | 5.42190 | 3.03182  |



**S5:** BHandH/6-31+G\*\* structure of complex of (*S*)-DNB-Ala and *t*BuCQN.

|   |          |          |          |
|---|----------|----------|----------|
| C | -0.94383 | -0.26806 | -0.68568 |
| C | 0.28816  | -0.43595 | -1.51666 |
| C | 1.31678  | -1.31473 | -1.10536 |
| C | 0.44034  | 0.24373  | -2.68874 |
| C | 1.29466  | -2.02561 | 0.11346  |
| C | 2.42502  | -1.44504 | -1.96878 |
| C | 1.59844  | 0.05594  | -3.45316 |
| C | 2.33478  | -2.85535 | 0.43387  |
| C | 3.47676  | -2.31040 | -1.60280 |
| N | 2.55179  | -0.75956 | -3.11650 |
| C | 3.43408  | -2.99828 | -0.43831 |
| O | 2.41343  | -3.56783 | 1.55036  |
| C | 1.39290  | -3.43414 | 2.49664  |
| O | -1.64136 | 0.87870  | -1.12214 |
| C | -1.69953 | 1.93947  | -0.32298 |
| O | -1.25632 | 1.95012  | 0.80959  |
| N | -2.33777 | 2.94475  | -0.90174 |
| C | -2.57206 | 4.24351  | -0.28469 |
| C | -3.43604 | 4.07063  | 0.94427  |
| C | -1.26084 | 4.90910  | 0.06846  |
| C | -3.30188 | 5.06407  | -1.31973 |
| H | -0.67238 | -0.12793 | 0.36249  |
| H | -0.31520 | 0.94474  | -3.01541 |
| H | 0.48640  | -1.87928 | 0.81919  |
| H | 1.73109  | 0.61289  | -4.37467 |
| H | 4.32021  | -2.38216 | -2.27811 |
| H | 4.23972  | -3.65250 | -0.13108 |
| H | 1.63362  | -4.12586 | 3.29904  |
| H | 1.35508  | -2.41552 | 2.88961  |
| H | 0.42233  | -3.69908 | 2.06729  |
| H | -2.57148 | 2.82174  | -1.87232 |
| H | -4.39499 | 3.62103  | 0.67912  |
| H | -2.94227 | 3.43334  | 1.67789  |
| H | -3.62655 | 5.04235  | 1.40259  |
| H | -0.62245 | 4.99814  | -0.81128 |
| H | -1.45368 | 5.90535  | 0.46995  |
| H | -0.72643 | 4.33179  | 0.82228  |
| H | -3.52963 | 6.05065  | -0.91692 |
| H | -2.68934 | 5.20113  | -2.21427 |
| H | -4.24500 | 4.59038  | -1.60287 |
| C | -1.83953 | -1.49324 | -0.80453 |
| C | -2.63349 | -1.54839 | -2.11526 |
| H | -1.16149 | -2.34827 | -0.74833 |
| C | -3.72708 | -0.57451 | 0.42102  |
| C | -3.43145 | -2.91017 | 0.20770  |
| C | -4.11158 | -1.62253 | -1.77892 |
| H | -2.44039 | -0.65907 | -2.71784 |
| H | -2.32619 | -2.40630 | -2.71532 |

|   |          |          |          |
|---|----------|----------|----------|
| H | -4.39791 | -0.83856 | 1.23920  |
| H | -3.23952 | 0.34512  | 0.74226  |
| C | -4.46299 | -0.42979 | -0.91028 |
| C | -4.40834 | -2.89025 | -0.97934 |
| H | -3.95195 | -3.11908 | 1.14375  |
| H | -2.68032 | -3.69386 | 0.07411  |
| H | -4.70575 | -1.62245 | -2.69455 |
| H | -5.54214 | -0.38057 | -0.74948 |
| H | -4.16557 | 0.49085  | -1.41767 |
| H | -5.43518 | -2.81264 | -0.60644 |
| N | -2.73574 | -1.64295 | 0.34178  |
| C | -4.31164 | -4.13093 | -1.78519 |
| C | -5.31423 | -4.96260 | -2.00772 |
| H | -3.33389 | -4.35880 | -2.20682 |
| H | -5.18992 | -5.85712 | -2.60394 |
| H | -6.30008 | -4.77494 | -1.59582 |
| C | -1.09580 | 1.50162  | 4.66878  |
| C | -0.50537 | 0.40045  | 3.83509  |
| H | -1.64000 | 2.20594  | 4.03706  |
| H | -1.80312 | 1.09576  | 5.38990  |
| N | 0.38631  | 0.90900  | 2.83258  |
| C | -1.58475 | -0.40702 | 3.15055  |
| H | 0.08657  | -0.28586 | 4.44740  |
| H | -0.05629 | 1.42983  | 2.08489  |
| C | 1.60648  | 0.39734  | 2.66199  |
| O | -1.10957 | -1.25711 | 2.27786  |
| O | -2.75747 | -0.25871 | 3.36536  |
| O | 2.11394  | -0.40025 | 3.42504  |
| C | 2.34420  | 0.81772  | 1.43798  |
| H | -1.84895 | -1.54082 | 1.61218  |
| C | 1.83959  | 1.69812  | 0.50453  |
| C | 3.55438  | 0.18932  | 1.20171  |
| C | 2.54821  | 1.92050  | -0.65730 |
| H | 0.88653  | 2.19818  | 0.62226  |
| C | 4.22535  | 0.44916  | 0.03173  |
| H | 3.94105  | -0.51623 | 1.92635  |
| C | 3.74399  | 1.30634  | -0.93225 |
| N | 1.96142  | 2.77485  | -1.65865 |
| N | 5.46196  | -0.25086 | -0.22993 |
| H | 4.26651  | 1.45805  | -1.86657 |
| O | 2.61396  | 3.03029  | -2.63199 |
| O | 0.83527  | 3.16437  | -1.46385 |
| O | 5.97467  | -0.07871 | -1.30302 |
| O | 5.88674  | -0.96615 | 0.63556  |
| H | -0.30539 | 2.03501  | 5.19521  |

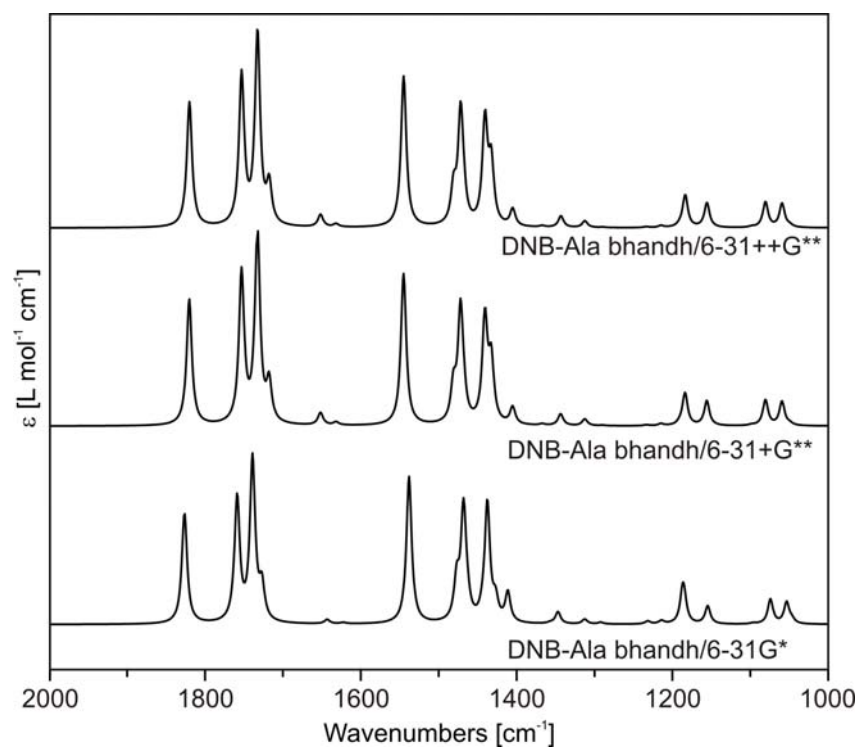

**S6:** BHandH IR absorption spectra of (*S*)-DNB-Ala using various basis sets.

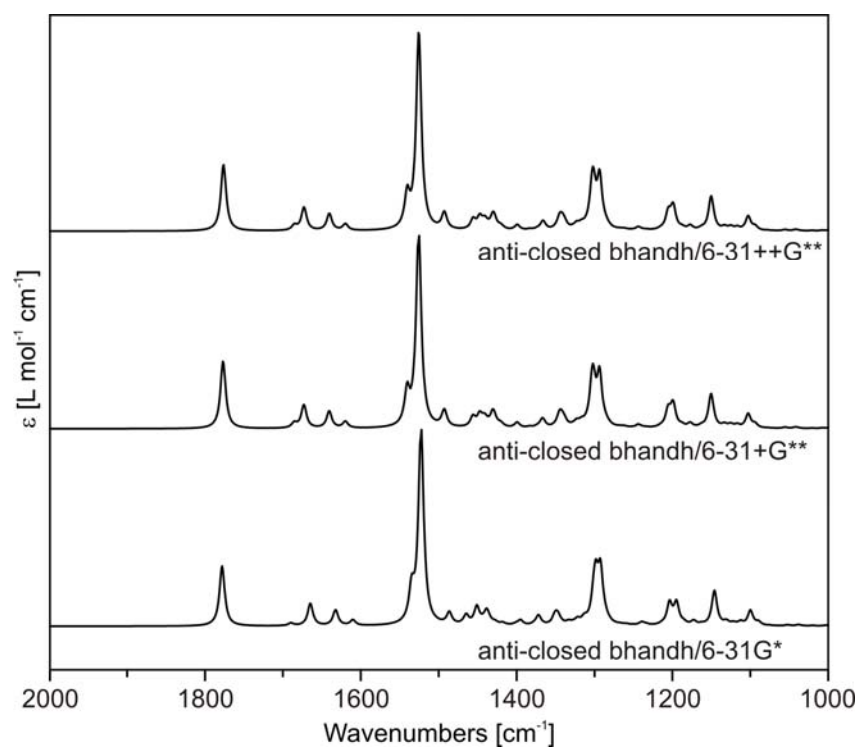

**S7:** BHandH IR absorption spectra of *anti*-closed conformer of tBuCQN using various basis sets.

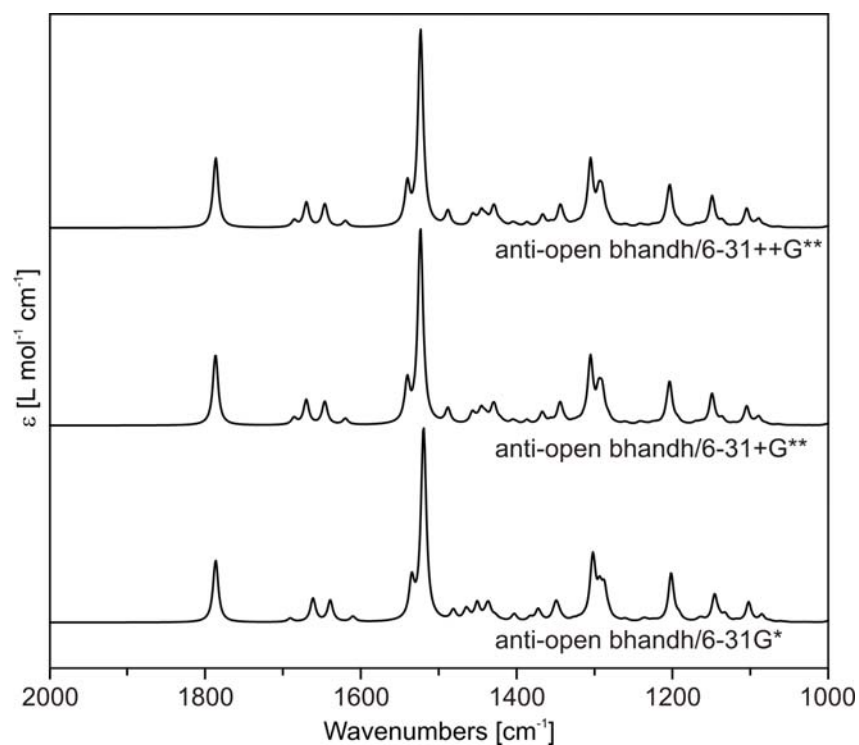

**S8:** BHandH IR absorption spectra of *anti*-open conformer of tBuCQN using various basis sets.

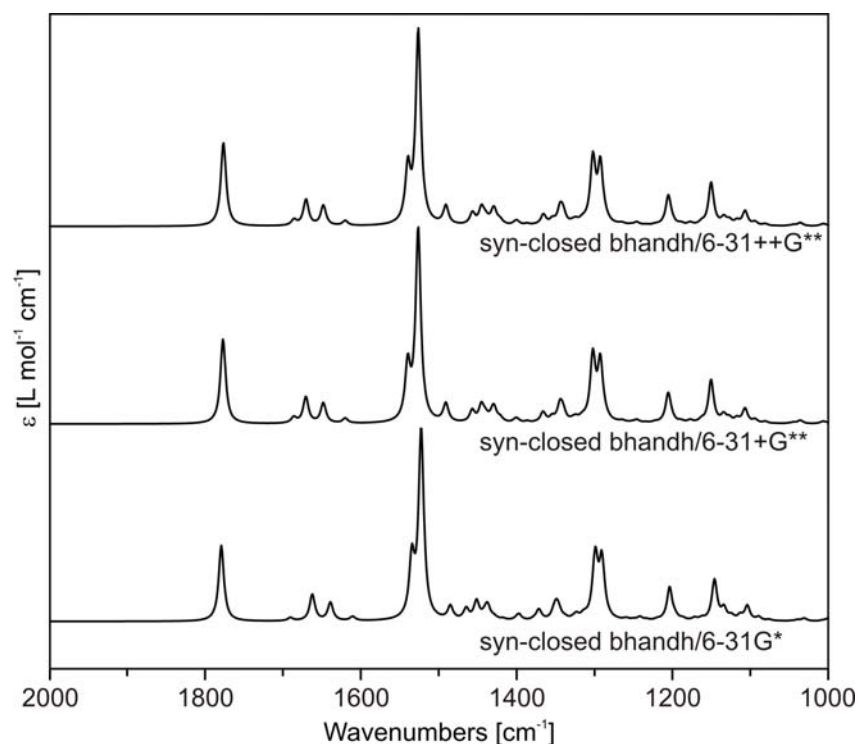

**S9:** BHandH IR absorption spectra of *syn*-closed conformer of tBuCQN using various basis sets.

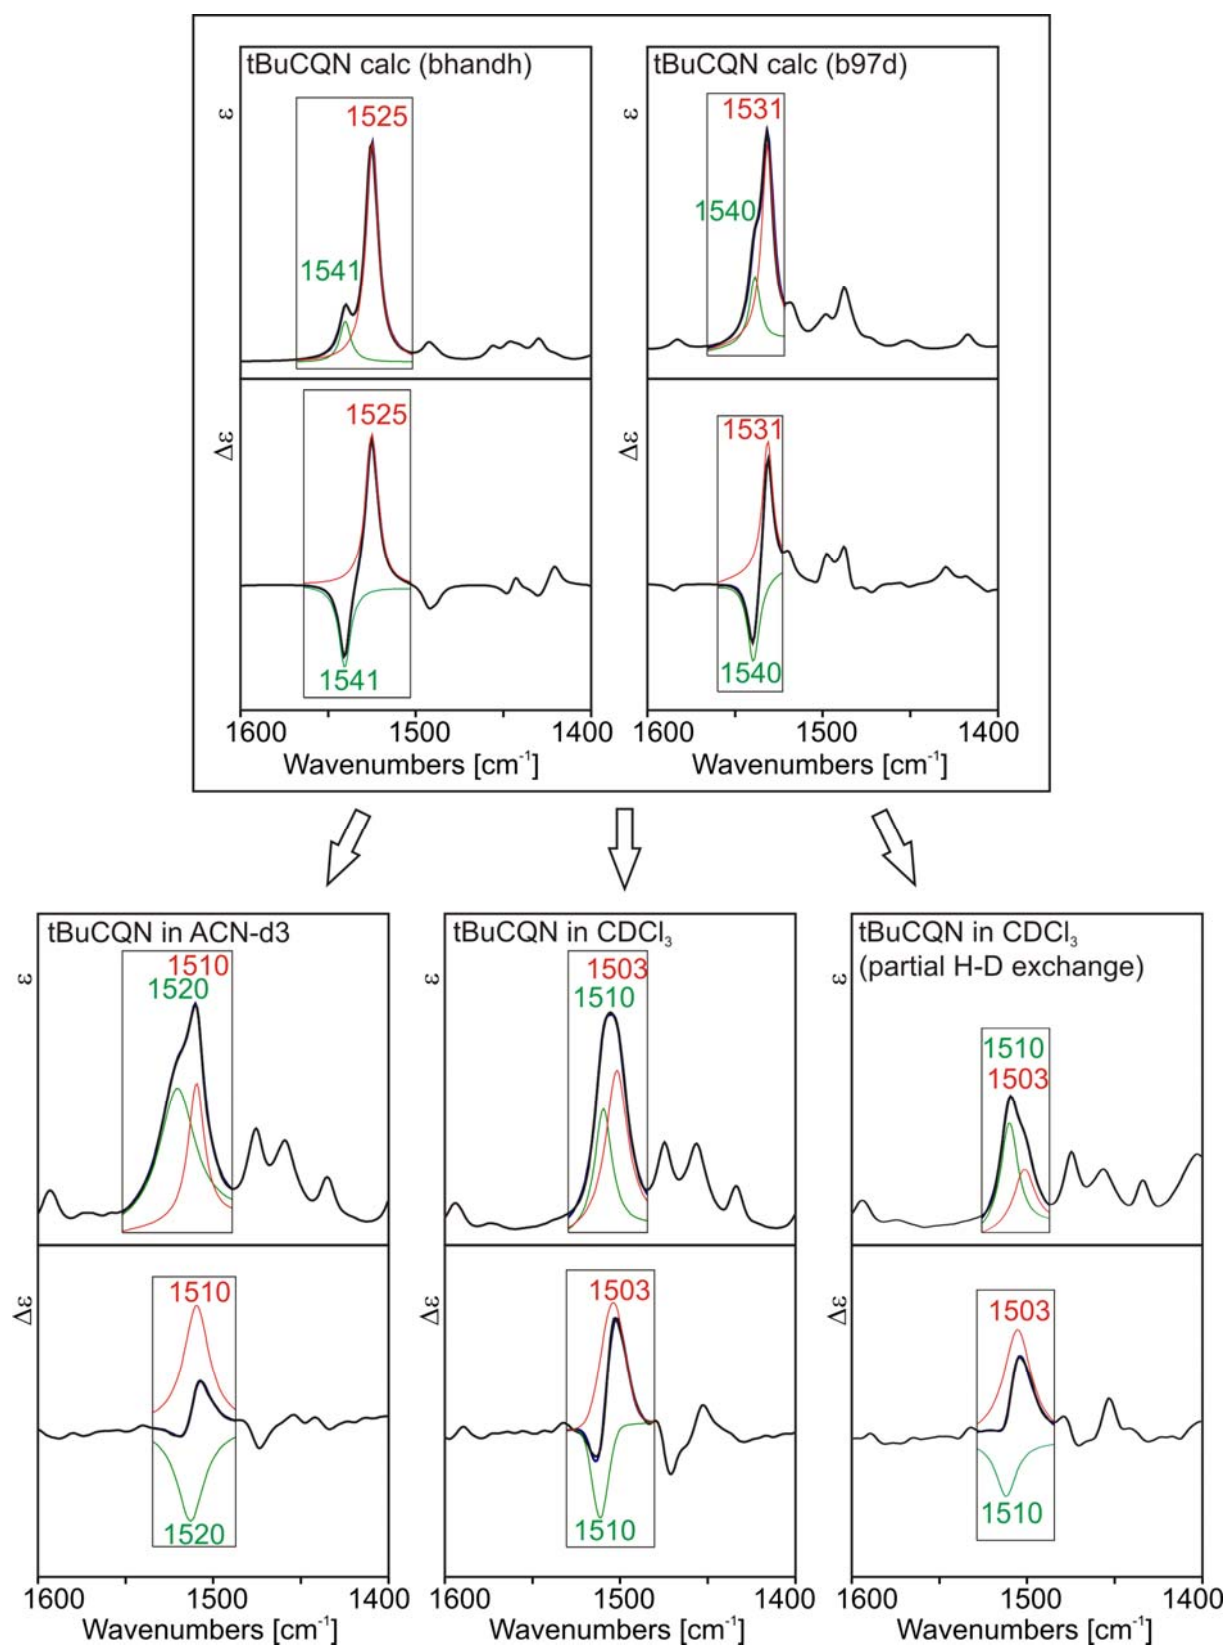

**S10:** Assignment of Carbamate II vibration (green) and quinoline deformation vibration (red) modes in the IR absorption and VCD spectrum of tBuCQN.

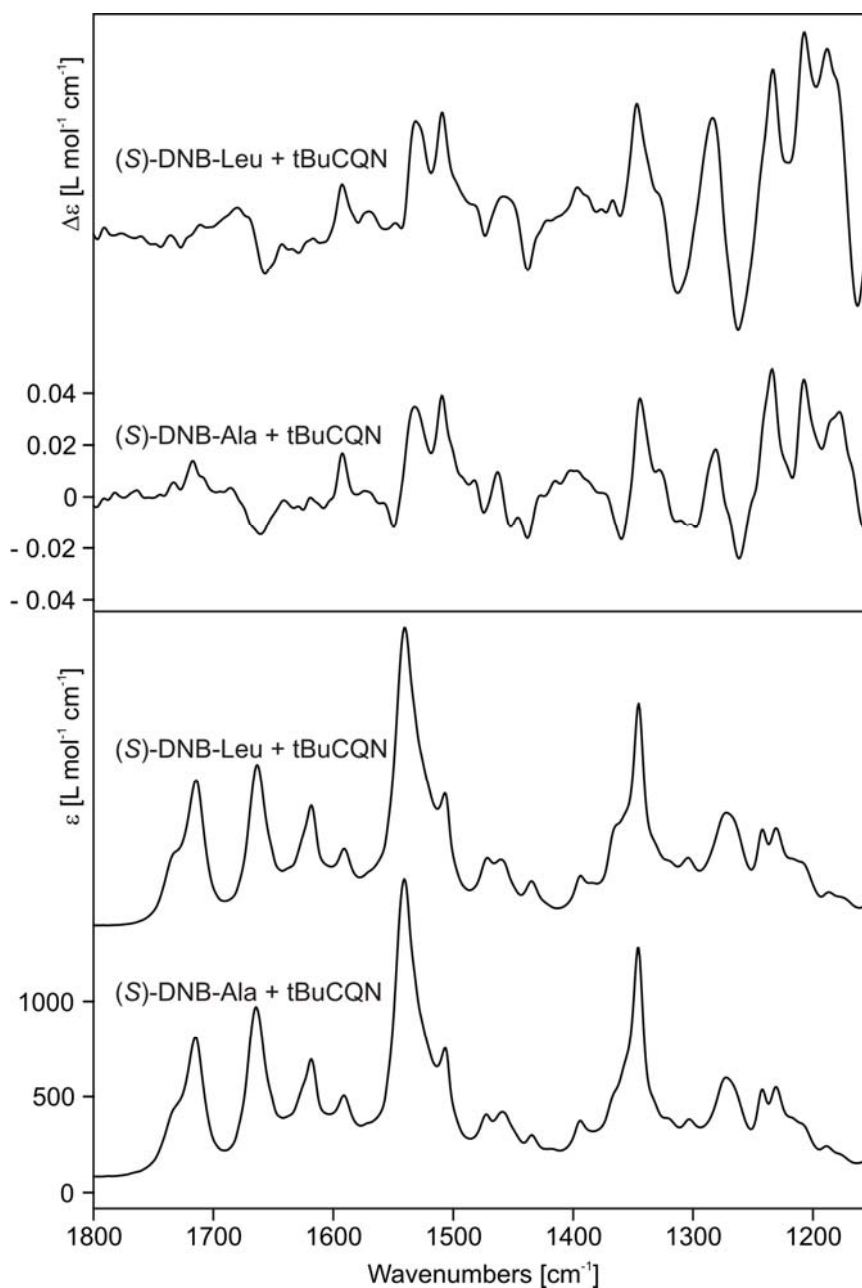

**S11:** Experimental VCD and IR absorption spectra of complexes of tBuCQN with (S)-DNB-Ala and (S)-DNB-Leu in deuterated acetonitrile.

## S12: Details about the conformational analysis

### a) *t*BuCQN

Relative energies and populations of *t*BuCQN conformers.

| Name                  | Relative free energy (kJ/mol) | Population (T=298K) |
|-----------------------|-------------------------------|---------------------|
| <i>anti</i> -closed-E | 0                             | 65%                 |
| <i>anti</i> -open-E   | 2.27                          | 26%                 |
| <i>syn</i> -closed-E  | 4.94                          | 9%                  |

The analysis of conformational degrees of freedom was performed for those not present in previous works. (N. M. Maier, S. Schefzick, G. M. Lombardo, M. Feliz, K. Rissanen, W. Lindner and K. B. Lipkowitz, *Journal of the American Chemical Society*, 2002, **124**, 8611) :

(i) The ethylene group on quinuclidine can be oriented *syn* (over) or *anti* (away) from the bicyclic system. The *anti* orientation is preferred by 5 kJ/mol, the barrier for rotation is approximately 15 kJ/mol.

(ii) The orientation of methoxy group on the quinoline group was modelled by 4-methyl-6-methoxyquinoline. The *anti* orientation of methoxy group (toward the C5) is preferred by 5 kJ/mol with relatively low lying barrier (15 kJ/mol above the *anti* orientation).

(iii) Carbamate moiety can be seen as possessing C=N double bond. The *E* orientation is preferred by 9 kJ/mol above the *Z*, with high barrier for rotation (estimated ~60 kJ/mol).

The geometries of whole *t*BuCQN were optimized at the B3LYP/6-311++G(2df,2pd) level of theory and the Gibbs free energy was considered for Boltzmann population analysis.

### b) DNB-Ala

Relative energies and populations of DNB-Ala conformers.

| Conformer no. | Relative free energy (kJ/mol) | Population (T=298K) |
|---------------|-------------------------------|---------------------|
| 1             | 0                             | 91.8%               |
| 2             | 7.15                          | 4.9%                |
| 3             | 9.47                          | 1.9%                |
| 4             | 11.10                         | 1.0%                |
| 5             | 12.69                         | 0.5%                |

The conformational analysis of DNB-Ala was carried out at B3LYP/6-31G\* level of theory. In the process, two dihedral angles were changed. The first one changed the *E/Z* conformation of the amide (i.e. dihedral angle 0 and 180°), the second one defined as N(amide)-C $\alpha$ -C(carboxyle)-O(carboxyle) changed the angle between the amide and the carboxyle group (dihedral angle 0-330° with a step of 30°). With regard to the results of the Boltzmann population analysis we considered the conformer no.1 as the only significantly populated conformer.
